# Supplementary material for: Transcriptional and Post-Transcriptional Mechanisms for Oncogenic Overexpression of Ether À Go-Go K+ Channel
Source: PubMed Central journal article supplement (PMC3105031; doi:10.1371/journal.pone.0020362), 2011-05-31
Supplement: pone.0020362.s001.pdf [file pone.0020362.s001.pdf]

## Supplementary Figures

### Figure S1

1 GAGAGATTTC TGGGCAAGAA TTAGTTCTTC TGTTTTTGAA ATTAATTAAC TGAGACAGGA  
.....  
541 CATTGTGTGC TACGGTAAAA ACAACCCAAG ACAACTCTTC TGAAGCTGAA TCTGCCAGTC  
601 ACTCTAAATC TGCAC TATTG CAATACGACT TCATTAATTA CTGCTCAAAC ACTGGCCTAG  
TATA Box  
.....  
901 GTGGCGCTGC CGTCCCAGCC TTGGTCCACG GCCGCCCGCC ACTTCCCTGC CTCTGCGGGA  
961 GCCCCCAGC TTGGTCTCCC GCAGGCCGGC GGTGGGGCAC GAGCCCGGTA GGGGGCGCCG  
1021 CCGGCCAGG CGCCGCTGCT CCCTCCGCC Sp1 ACCCGAGGC AP2 GGCTGCCGCT AGCCGAGGCC  
1081 GGC GCGAGTG CACTGCGAGG CGGGCCGAG GGA GGGAGGC GCGAAGAGGG CGCGAGGTA  
E2F (-22)  
↪ TSS (-1)  
1141 GCAGCCAGAG GGAGCCGCCA GCCCTGCCTG CGGATCCCCG CCGGGCGCAT GGGGCGCTTC  
1201 GAGCCGGGAC TGCGTGC GGG CCCCAGAGCC AGTTTCCTGC TGTCGTAAGA AGCCGCGCCA  
1261 GGACGCCCGC CGGACCCCGA GCTGCTGGGA GGATG (Translational Start Site)
