# Supplementary material for: Transcriptional and Post-Transcriptional Mechanisms for Oncogenic Overexpression of Ether À Go-Go K+ Channel
Source: PubMed Central journal article supplement (PMC3105031; doi:10.1371/journal.pone.0020362), 2011-05-31
Supplement: pone.0020362.s005.pdf [file pone.0020362.s005.pdf]

Figure S5

*hsa-miR-34a*                      *hsa-miR-34b*                      *hsa-miR-34c*  
5'-UGGCAGUGUCUUAGCUGGUUGU-3'    5'-UAGGCAGUGUCAUUAGCUGAUUG-3'    5'-AGGCAGUGUAGUUAGCUGAUUGC-3'  
3'-ACCGTCACAGAATCGACCAACAActtaaatgATCCGTCACAGTAATCGACTAACcttaaatgTCCGTCACATCAATCGACTAACG-5'

MT-AMO
