# Supplementary material for: Transcriptional and Post-Transcriptional Mechanisms for Oncogenic Overexpression of Ether À Go-Go K+ Channel
Source: PubMed Central journal article supplement (PMC3105031; doi:10.1371/journal.pone.0020362), 2011-05-31

Figure S6

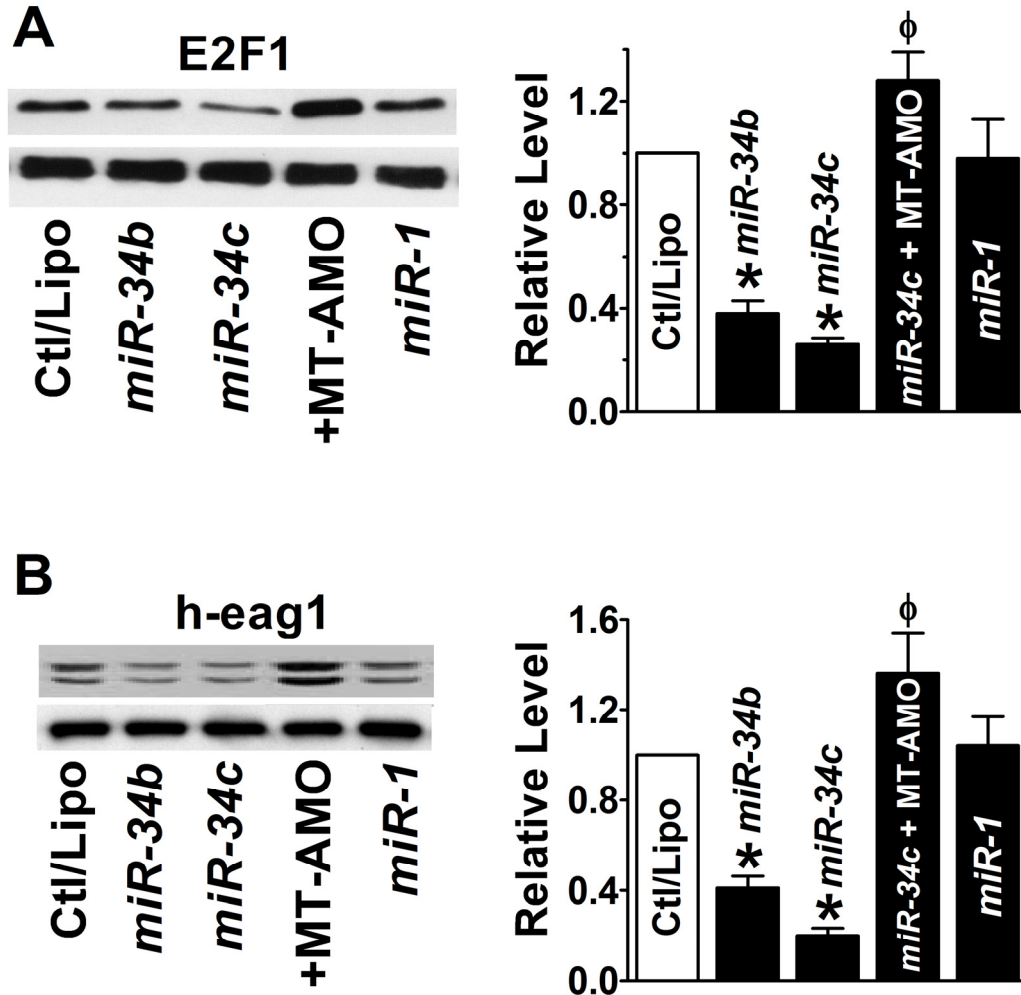

Supplement: pone.0020362.s006.pdf [file pone.0020362.s006.pdf]
